# Supplementary material
Source: MDPI journal article supplement (https://www.mdpi.com/2410-3888/7/5/226)
Supplement: s1 [file s1]

## **Supplementary Material**

### **Allometry and individual growth of the temperate Pacific sardine (*Sardinops sagax*) stock in the southern California Current System**

Concepción Enciso-Enciso, Manuel Otilio Nevárez-Martínez, Rebeca Sánchez-Cárdenas, Emigdio Marín-Enríquez, Luis A. Salcido-Guevara, Carolina Minte-Vera

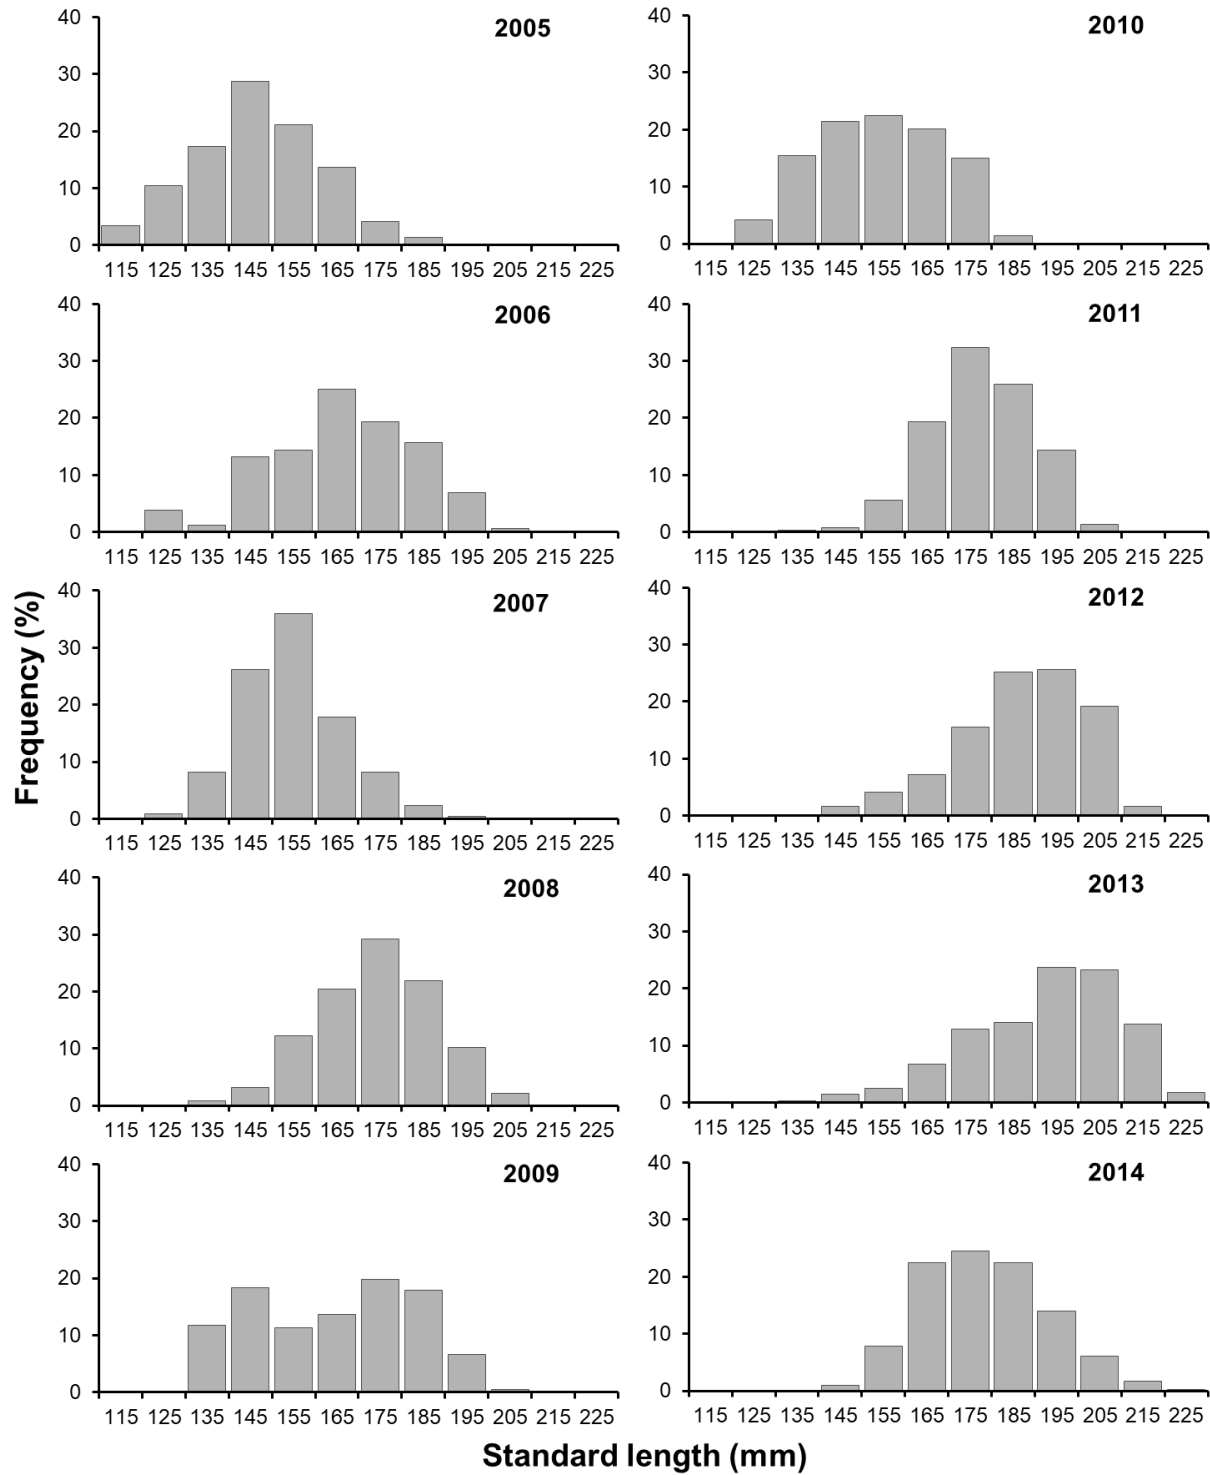

**Figure S1.** Standard-length frequency distribution by year of the temperate *Sardinops sagax* stock in the southern of California Current System (CCS).

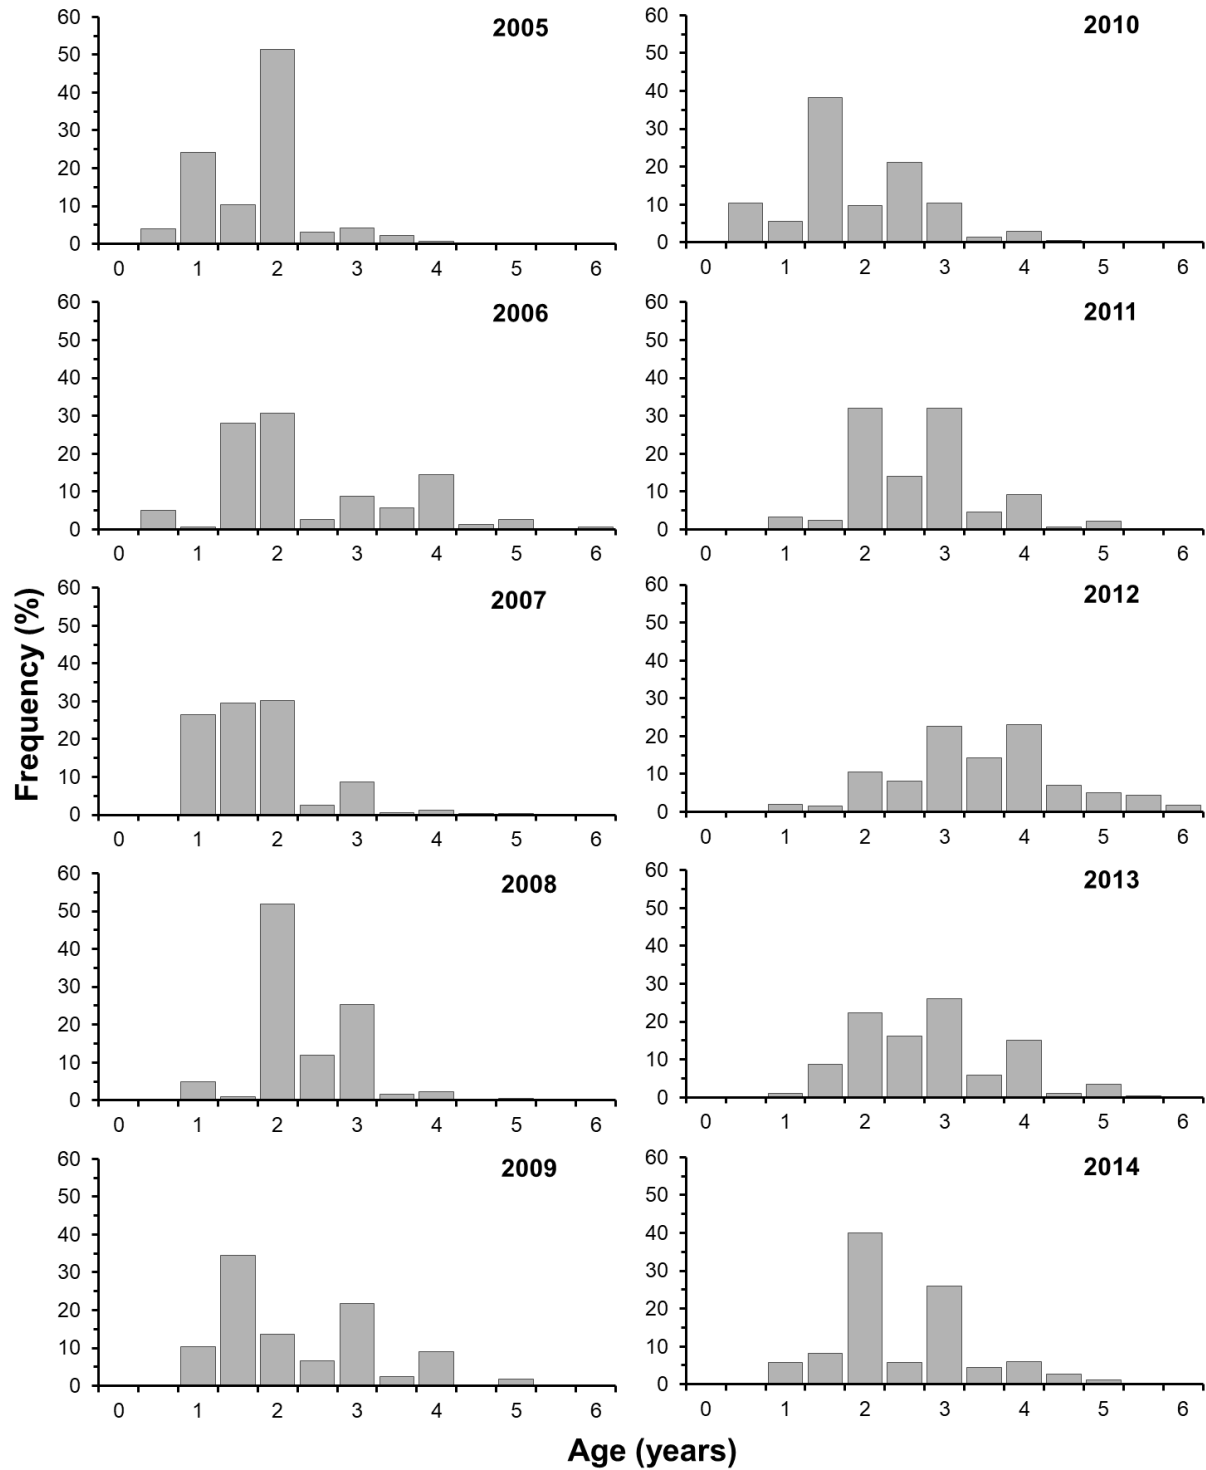

**Figure S2.** Age frequency distribution by year the temperate *Sardinops sagax* stock in the southern of California Current System (CCS).

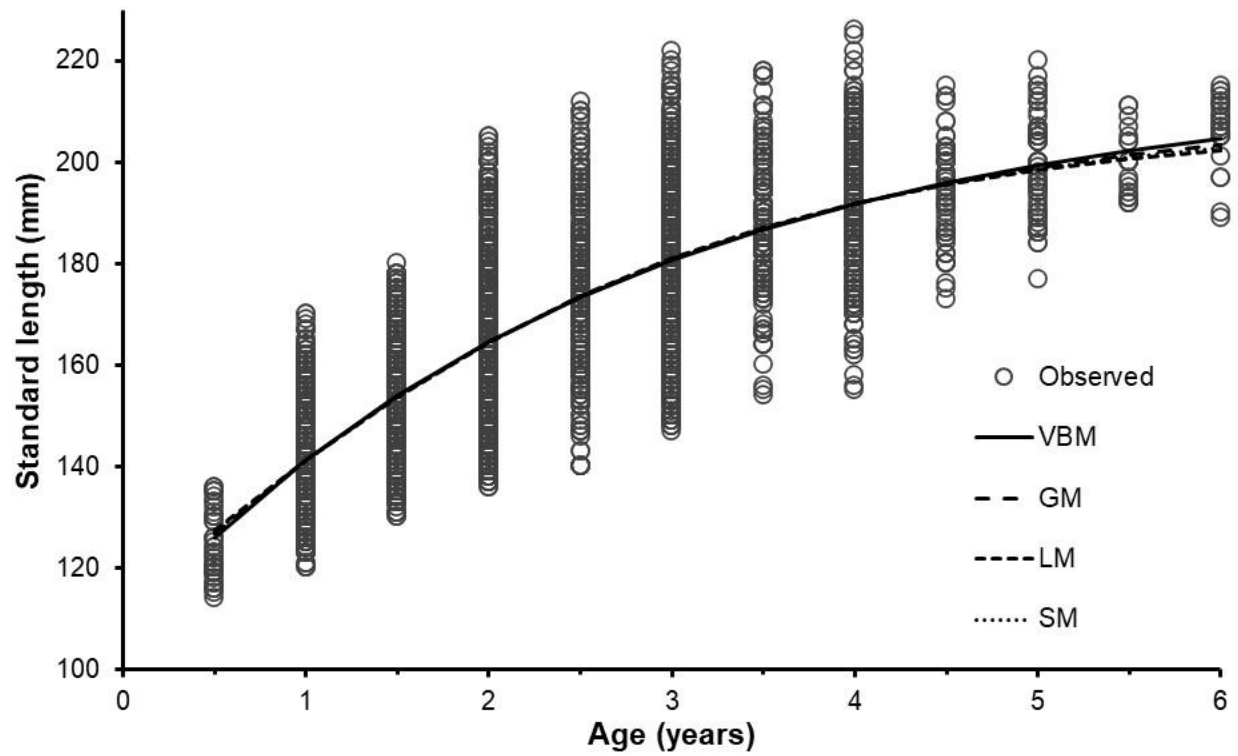

**Figure S3.** Growth models adjusted to age-at-length raw data of the temperate *Sardinops sagax* stock in the southern California Current System (CCS) during study period (2005-2014).

**Table S1.** Values and 95% confidence intervals (CI;  $\alpha = 0.05$ ) of parameters  $a$  and  $b$  obtained by adjusting, to raw *TM-SL* data bolstered by simulated values, the potential model for each year from 2005-2014 of the temperate *Sardinops sagax* stock and growth type (GT; +H, hyper-allometry; -H, hypo-allometry).

| Year | CI <sub>inf</sub>      | a <sub>mean</sub>      | CI <sub>sup</sub>      | CI <sub>inf</sub> | b <sub>mean</sub> | CI <sub>sup</sub> | n   | GT |
|------|------------------------|------------------------|------------------------|-------------------|-------------------|-------------------|-----|----|
| 2005 | $2.958 \times 10^{-6}$ | $3.095 \times 10^{-6}$ | $3.210 \times 10^{-6}$ | 3.311             | 3.321             | 3.330             | 583 | +H |
| 2006 | $2.313 \times 10^{-5}$ | $2.347 \times 10^{-5}$ | $2.376 \times 10^{-5}$ | 2.919             | 2.924             | 2.928             | 334 | -H |
| 2007 | $8.824 \times 10^{-6}$ | $9.209 \times 10^{-6}$ | $9.608 \times 10^{-6}$ | 3.102             | 3.104             | 3.107             | 700 | +H |
| 2008 | $2.490 \times 10^{-5}$ | $2.522 \times 10^{-5}$ | $2.545 \times 10^{-5}$ | 2.912             | 2.914             | 2.916             | 539 | -H |
| 2009 | $1.752 \times 10^{-6}$ | $1.772 \times 10^{-6}$ | $1.793 \times 10^{-6}$ | 3.419             | 3.421             | 3.424             | 332 | +H |
| 2010 | $2.665 \times 10^{-5}$ | $2.729 \times 10^{-5}$ | $2.755 \times 10^{-5}$ | 2.894             | 2.899             | 2.903             | 358 | -H |
| 2011 | $1.097 \times 10^{-5}$ | $1.110 \times 10^{-5}$ | $1.122 \times 10^{-5}$ | 3.080             | 3.082             | 3.084             | 459 | +H |
| 2012 | $5.230 \times 10^{-5}$ | $3.465 \times 10^{-5}$ | $5.319 \times 10^{-5}$ | 2.788             | 2.867             | 2.791             | 588 | -H |
| 2013 | $4.234 \times 10^{-6}$ | $4.269 \times 10^{-6}$ | $4.328 \times 10^{-6}$ | 3.251             | 3.254             | 3.258             | 466 | +H |
| 2014 | $1.595 \times 10^{-5}$ | $1.610 \times 10^{-5}$ | $1.622 \times 10^{-5}$ | 2.988             | 2.989             | 2.991             | 556 | -H |
